# Supplementary material
Source: MDPI journal article supplement (https://www.mdpi.com/2076-3417/14/1/108)
Supplement: s1 [file s1]

Brightway code of the implemented function to create a copy of an activity, identified with activity.id, and will modify the copied activity by substituting the technosphere processes with the preferable location indicated by the parameter locations.

```
def new_act_diff_location(database, activity_id, locations, new_name, project_name=Project_name):
    ''' This function will create a copy of an activity, identified with activity.id, and will modify the
    copied activity by
    substituting the technosphere processes with the preferable location indicated by the parameter
    locations.
    '''
    # is the modified process already in the database?
    if (len([act for act in database if act['name']==new_name])==0):
        # find activity to modify
        act_origin = [act for act in database if act.id==activity_id][0]
        act_new = act_origin.copy()
        act_new['name'] = new_name
        act_new['location'] = project_name
        act_new.save()

        for exc in act_new.technosphere():
            exc.delete()
            exc.save()
            act_new.save()

        # If GLO or RoW were not considered, add it at the end
        if 'RoW' not in locations:
            locations.append('RoW')
        if 'GLO' not in locations:
            locations.append('GLO')

        locations.reverse()

        for exc in act_origin.technosphere():
            for loc in locations:
                # Search for an exact match of the reference product with specified location
                for activity in database:
                    if activity['reference product'] == exc['name'] and loc in
                        activity['location'] and activity['name'] == exc.input['name']:
                        new_edge = activity

                act_new.new_edge(
                    input=new_edge.key,
                    name=new_edge['name'],
                    amount=exc.amount,
                    type="technosphere",
                ).save()
                new_edge.save()

        return act_new

print('The modified activity is already present in the database!!!')
return [act for act in database if act['name']==new_name][0]
```

Table S1: LCI of the traditional concrete.

| <b>Traditional concrete ingredient</b> | <b>Unit</b> | <b>Amount</b> | <b>Activity</b>                                  |
|----------------------------------------|-------------|---------------|--------------------------------------------------|
| cement, Portland                       | kilogram    | 316           | cement production, Portland, GB                  |
| gravel                                 | ton         | 0.28072       | marine gravel extraction and transport, GB       |
| gravel                                 | ton         | 0.99528       | land gravel extraction and transport, GB         |
| sand                                   | ton         | 0.15488       | marine sand extraction and transport, GB         |
| sand                                   | ton         | 0.54912       | land sand extraction and transport, GB           |
| tap water                              | kilogram    | 142           | market for tap water, Europe without Switzerland |

Table S2: LCI of marine sand and gravel extraction (Kemp, 2008).

| <b>Stage</b> | <b>Flow</b> | <b>Unit</b>   | <b>Amount</b> | <b>Activity</b>                                        |
|--------------|-------------|---------------|---------------|--------------------------------------------------------|
| Dredging     | Sand/Gravel | kg            | 1000          | Sand/Gravel, unspecified, natural resources, in ground |
|              | Diesel      | MJ            | 18            | diesel, burned in fishing vessel, GLO                  |
| Unloading    | Diesel      | MJ            | 7.1           | diesel, burned in building machine, GLO                |
| Processing   | Electricity | kWh           | 1.51          | market for electricity, medium voltage, GB             |
|              | Water       | kilogram      | 350           | market for tap water, Europe without Switzerland       |
| Transport    |             | ton*kilometer | 250           | transport, freight, inland waterways, barge, RER       |
| Output       | Sand/Gravel | ton           | 1             |                                                        |

Table S3: LCI of land sand and gravel extraction (Kemp, 2008).

| <b>Stage</b>   | <b>Flow</b> | <b>Unit</b>   | <b>Amount</b> | <b>Activity</b>                                        |
|----------------|-------------|---------------|---------------|--------------------------------------------------------|
| Crushing rocks | Sand/Gravel | kg            | 1000          | Sand/Gravel, unspecified, natural resources, in ground |
|                | Diesel      | MJ            | 27.74         | diesel, burned in building machine, GLO                |
| Processing     | Electricity | kWh           | 3.05          | market for electricity, medium voltage, GB             |
|                | Water       | kilogram      | 350           | market for tap water, Europe without Switzerland       |
| Transport      |             | ton*kilometer | 400           | market group for transport, freight train, RER         |
| Output         | Sand/Gravel | ton           | 1             |                                                        |

Table S4: Characterization factors of the biosphere flows according to the impact assessment method EF 3.1 EN15804, considered to compute the water use impact.

| <b>Biosphere flow</b>                             | <b>Categories</b>                                 | <b>CF</b> |
|---------------------------------------------------|---------------------------------------------------|-----------|
| Water                                             | ('air', 'lower stratosphere + upper troposphere') | -3.5      |
| Water                                             | ('water', 'ground-')                              | -3.5      |
| Water                                             | ('water', 'surface water')                        | -3.5      |
| Water                                             | ('water', 'ocean')                                | 0         |
| Water                                             | ('air', 'non-urban air or from high stacks')      | -3.5      |
| Water                                             | ('air',)                                          | -3.5      |
| Water                                             | ('air', 'urban air close to ground')              | -3.5      |
| Water                                             | ('air', 'low population density, long-term')      | -3.5      |
| Water                                             | ('water',)                                        | -3.5      |
| Water, cooling,<br>unspecified natural origin     | ('natural resource', 'in water')                  | 3.5       |
| Water, in air                                     | ('natural resource', 'in air')                    | 3.5       |
| Water, lake                                       | ('natural resource', 'in water')                  | 3.5       |
| Water, river                                      | ('natural resource', 'in water')                  | 3.5       |
| Water, salt, ocean                                | ('natural resource', 'in water')                  | 0         |
| Water, salt, sole                                 | ('natural resource', 'in water')                  | 3.5       |
| Water, turbine use,<br>unspecified natural origin | ('natural resource', 'in water')                  | 3.5       |
| Water, unspecified<br>natural origin              | ('natural resource', 'in ground')                 | 3.5       |
| Water, unspecified<br>natural origin              | ('natural resource', 'in water')                  | 3.5       |
| Water, unspecified<br>natural origin              | ('natural resource', 'fossil well')               | 3.5       |
| Water, well, in ground                            | ('natural resource', 'in water')                  | 3.5       |

| Impact category                               | Impact unit                       | Cement   | Coarse aggregates | Fine aggregates | Water    |
|-----------------------------------------------|-----------------------------------|----------|-------------------|-----------------|----------|
| acidification                                 | mol H <sup>+</sup> -Eq            | 6,37E-01 | 2,15E-01          | 1,19E-01        | 2,39E-04 |
| climate change                                | kg CO <sub>2</sub> -Eq            | 2,94E+02 | 2,64E+01          | 1,46E+01        | 4,46E-02 |
| climate change: biogenic                      | kg CO <sub>2</sub> -Eq            | 4,57E+00 | 1,56E-01          | 8,63E-02        | 8,97E-04 |
| climate change: fossil                        | kg CO <sub>2</sub> -Eq            | 2,89E+02 | 2,62E+01          | 1,45E+01        | 4,36E-02 |
| climate change: land use and land use change  | kg CO <sub>2</sub> -Eq            | 4,88E-02 | 3,46E-02          | 1,91E-02        | 7,61E-05 |
| ecotoxicity: freshwater                       | CTUe                              | 4,28E+02 | 1,49E+02          | 8,22E+01        | 1,73E-01 |
| energy resources: non-renewable               | MJ, net calorific value           | 1,34E+03 | 3,87E+02          | 2,14E+02        | 7,95E-01 |
| eutrophication: freshwater                    | kg P-Eq                           | 2,82E-02 | 6,84E-03          | 3,78E-03        | 2,89E-05 |
| eutrophication: marine                        | kg N-Eq                           | 1,94E-01 | 8,39E-02          | 4,63E-02        | 4,69E-05 |
| eutrophication: terrestrial                   | mol N-Eq                          | 2,18E+00 | 9,00E-01          | 4,97E-01        | 4,47E-04 |
| human toxicity: carcinogenic                  | CTUh                              | 7,07E-08 | 2,45E-08          | 1,35E-08        | 1,97E-10 |
| human toxicity: non-carcinogenic              | CTUh                              | 1,92E-06 | 2,11E-07          | 1,17E-07        | 2,56E-09 |
| ionising radiation: human health              | kBq U235-Eq                       | 1,05E+01 | 4,21E+00          | 2,32E+00        | 1,66E-02 |
| land use                                      | dimensionless                     | 3,17E+02 | 2,13E+02          | 1,17E+02        | 1,71E-01 |
| material resources: metals/minerals           | kg Sb-Eq                          | 8,94E-04 | 6,34E-05          | 3,50E-05        | 2,41E-07 |
| ozone depletion                               | kg CFC-11-Eq                      | 1,53E-06 | 4,84E-07          | 2,67E-07        | 1,23E-09 |
| particulate matter formation                  | disease incidence                 | 4,96E-06 | 2,49E-06          | 1,37E-06        | 2,48E-09 |
| photochemical oxidant formation: human health | kg NMVOC-Eq                       | 6,37E-01 | 2,64E-01          | 1,46E-01        | 1,63E-04 |
| water use                                     | m <sup>3</sup> world eq. deprived | 2,58E-01 | 1,62E+00          | 8,92E-01        | 4,87E-01 |

Table S5: LCA results of the traditional concrete's ingredients.

Table S6: LCA results for climate change impact category for the concrete samples.

| Concrete sample      | Unit                   | Climate change impact |
|----------------------|------------------------|-----------------------|
| Traditional Concrete | kg CO <sub>2</sub> -Eq | 334.95                |
| Rice Husk Ash        | kg CO <sub>2</sub> -Eq | 319.29 (±6.45)        |
| Wood Ash             | kg CO <sub>2</sub> -Eq | 284.44 (±38.72)       |
| Wheat straw          | kg CO <sub>2</sub> -Eq | 213.46 (±12)          |
| Corn cob             | kg CO <sub>2</sub> -Eq | 212.68 (±12.08)       |
